# Supplementary material for: Disruption of the Rice Plastid Ribosomal Protein S20 Leads to Chloroplast Developmental Defects and Seedling Lethality
Source: PubMed Central journal article supplement (PMC3789801; doi:10.1534/g3.113.007856), 2013-10-01
Supplement: supp_g3.113.007856_007856SI.pdf [file supp_g3.113.007856_007856SI.pdf]

## **Disruption of the Rice Plastid Ribosomal Protein S20 Leads to Chloroplast Developmental Defects and Seedling Lethality**

Xiaodi Gong<sup>1</sup>, Quan Jiang<sup>1</sup>, Jianlong Xu<sup>2</sup>, Jianhui Zhang<sup>1</sup>, Sheng Teng<sup>3</sup>, Dongzhi Lin<sup>1\*</sup>, Yanjun Dong<sup>1\*</sup>

<sup>1</sup>Development Center of Plant Germplasm Resources, College of Life and Environmental Sciences, Shanghai Normal University, Shanghai 200234, China

<sup>2</sup>Institute of Crop Sciences, Chinese Academy of Agricultural Sciences, 12 South Zhong-Guan Cun Street, Beijing, 100081, China

<sup>3</sup>Institute of Plant Physiology and Ecology, Shanghai Institute for Biological Sciences, Chinese Academy of Sciences, Shanghai 200032, China

**\*Corresponding author:** Development Center of Plant Germplasm Sources, College of Life and Environmental Sciences, Shanghai Normal University, Shanghai 200234, China. E-mail: dzlin@shun.edu.cn and dong@shnu.edu.cn

**DOI: 10.1534/g3.113.007856**

```

E.coli ----- 0
Nostoc ----- 0
ASL1  MATATSTLFSLSLSASLPSPAQPAPASLSLRAVSPRARLSASYAAFPIGGIGAWAAATP 60

E.coli -----MANIKSAKRAIQSEKARKHNASRRSMMRTFIKKVY 36
Nostoc --MDAILVNLVVCVHNYIVFLELTVANTKSAIKRAQIAERNRLRNKAYKSAVATLMKKYF 58
ASL1  ASSGRWRRRGLEVVCEAAKTGTATGRRPDSVKKRERQNDRHRIRNHARKAEMRTRMKKVL 120

E.coli AAIEAG-----DKAAAQKAFNEMQPIVDROAAKGLIHKNKAARHKANLTAQINKLA 87
Nostoc AAVEVYT--ANPTPE SKQAVEERI SEAYSKIDKAVKRGVLHPNTGARKKSRLAHKLPKA 116
ASL1  KALEKLRKKADATPEDIIQIEKWISEAYKALDRTVKVGMHRNTGNHRKSLARRKKAIE 180

E.coli ----- 87
Nostoc ----- 116
ASL1  ILRGWYVPNAEPAATS 196

```

**Figure S1** Amino acid sequence alignment of the three kinds of RPS20 proteins. Amino acids fully or semi-conserved are shaded black and gray, respectively.

**Table S1 PCR-based molecular markers designed for fine mapping**

| Marker | Primer Pairs                                     | Fragment Size<br>(bp) | Originating BAC |
|--------|--------------------------------------------------|-----------------------|-----------------|
| P1     | AGGGCCTTATATCAAGACACATGC<br>CCACGAACACTCGCATACCC | 216                   | AP003725        |
| P2     | GTGTTTGGCGAGGGGTCATTA<br>CATTCTCCCATCTATTGCC     | 178                   | AP003706        |
| P3     | CAACCTCGTCTTTGAGCCCA<br>CGCCGAAAATGAGCTCTAC      | 245                   | AP003374        |
| P4     | TTCATCCTGTCGCCAACG<br>ATGGATGCGTGATGCGTC         | 152                   | AP003335        |
| P5     | GGAAGGCATAGAACGCAAGA<br>CTGATGCCTATACCATGCTACTGT | 122                   | AP003335        |
| P6     | TTCTCCTTCTCCCGTTCCT<br>CGGCCCTGTACTTCTGATTC      | 152                   | AP003335        |
| P7     | CAACCAGTCTACAGCCACATCTC<br>AAGGGCGTATTTTCAGCGTC  | 205                   | AP003335        |
| P8     | CACCCAGAGCAAACACTGTCAG<br>GAACTGTACGTTTCCCCTG    | 261                   | AP004363        |
| P9     | GCCTTACAACCAACGACGACT<br>TATGTGTCTAGCTGCACTCCCA  | 181                   | AP003450        |

**Table S2 Primers for Real-time PCR**

| Gene name      | Forward primer (5'→3') | Reverse primer (5'→3') |
|----------------|------------------------|------------------------|
| <i>Cab1R</i>   | AGATGGGTTTAGTGCGACGAG  | TTTGGGATCGAGGGAGTATTT  |
| <i>CAO1</i>    | GATCCATACCCGATCGACAT   | CGAGAGACATCCGGTAGAGC   |
| <i>HEMA</i>    | CGCTATTTCTGATGCTATGGGT | TCTGGGTGATGATTGTTTGG   |
| <i>PORA</i>    | TGTACTGGAGCTGGAACAACAA | GAGCACAGCAAATCCTAGACG  |
| <i>YGL1</i>    | CAGTCTCCAATGGCCACCT    | TGCTTTCATCAGTGGCTGGT   |
| <i>RPS7</i>    | GCCAAAATCCATTCCAATTC   | GGAGATGTACACGAGGAGATTG |
| <i>RpoB</i>    | TATGGTCTAATCCGAGCGGT   | TATGGTCTAATCCGAGCGGT   |
| <i>rbcl</i>    | CTTGGCAGCATTCCGAGTAA   | ACAACGGGCTCGATGTGATA   |
| <i>psaA</i>    | GCGAGCAAATAAAACACCTTTC | GTACCAGCTTAACGTGGGGAG  |
| <i>psbA</i>    | CCCTCATTAGCAGATTCGTTTT | ATGATTGTATTCCAGGCAGAGC |
| <i>OsPoLP</i>  | ACCGTGCTTTCAGGCTTGG    | GCTGACTGATAATCACACG    |
| <i>FtsZ</i>    | AAAGGACATAACCTTGCAAG   | AGTTTTCTATTGAACCGTG    |
| <i>rbcS</i>    | TCCGCTGAGTTTTGGCTATTT  | GGACTTGAGCCCTGGAAGG    |
| <i>V2</i>      | GAGGAGTTCCTCACGATGAT   | AGCATCAATGATAGACTCC    |
| <i>RNRL</i>    | GTTAGATGCTTCACTACACAG  | GTACCATTGCCAACATGGCAAC |
| <i>RNRS</i>    | GCCAAAATCCATTCCAATTC   | GGAGATGTACACGAGGAGATTG |
| <i>16SrRNA</i> | CCGTTGGTGTCTTTCCGAT    | TTCAAGTCCGCCGTCAAATC   |
| <i>ASL1</i>    | CACGCTCTTCCCTCTCCT'    | GTAGGAGGCGGACAGGCG     |
| <i>OsRpoTp</i> | TCCTCATGTCTGAGCAAGGAT  | GAAAGAATGTCTGGACTTTG   |
| <i>Actin</i>   | AGGAAGGCTGGAAGAGGACC   | CGGGAAATTGTGAGGGACAT   |
