# Supplementary material for: Disruption of the Rice Plastid Ribosomal Protein S20 Leads to Chloroplast Developmental Defects and Seedling Lethality
Source: PubMed Central journal article supplement (PMC3789801; doi:10.1534/g3.113.007856), 2013-10-01
Supplement: supp_g3.113.007856_FigureS1.pdf [file supp_g3.113.007856_FigureS1.pdf]

```

E.coli ----- 0
Nostoc ----- 0
ASL1  MATATSTLFLSLSLSASLPSPAQPAPASLSLRAVSPRARLSASYAAFPIGGIGAWAAATP 60

E.coli -----MANIKSAKRAIQSEKARKHNASRRSMMRTFIKKVY 36
Nostoc --MDAILVNLVVCVHNYIVFLELTVANTKSAIKRAQIAERNRLRNKAYKSAVATLMKKYF 58
ASL1  ASSGRWRRRGLEVVCEAAKTGTATGRRPDSVKKRERQNDRHRIRNHARKAEMRTRMKKVL 120

E.coli AAIEAG-----DKAAAQKAFNEMQPIVDROAAKGLIHKNKAARHKANLTAQINKLA 87
Nostoc AAVEVYT--ANPTPE SKQAVEERI SEAYSKIDKAVKRGVLHPNTGARKKSRLAHKLPKA 116
ASL1  KALEKLRKKADATPEDIIQIEKWISEAYKALDRTVKVGMHRNTGNHRKSLARRKKAIE 180

E.coli ----- 87
Nostoc ----- 116
ASL1  ILRGWYVPNAEPAATS 196

```

**Figure S1** Amino acid sequence alignment of the three kinds of RPS20 proteins. Amino acids fully or semi-conserved are shaded black and gray, respectively.
