# Supplementary material for: Disruption of the Rice Plastid Ribosomal Protein S20 Leads to Chloroplast Developmental Defects and Seedling Lethality
Source: PubMed Central journal article supplement (PMC3789801; doi:10.1534/g3.113.007856), 2013-10-01
Supplement: supp_g3.113.007856_TableS1.pdf [file supp_g3.113.007856_TableS1.pdf]

**Table S1 PCR-based molecular markers designed for fine mapping**

| Marker | Primer Pairs                                     | Fragment Size<br>(bp) | Originating BAC |
|--------|--------------------------------------------------|-----------------------|-----------------|
| P1     | AGGGCCTTATATCAAGACACATGC<br>CCACGAACACTCGCATACCC | 216                   | AP003725        |
| P2     | GTGTTTGGCGAGGGGTCATTA<br>CATTCTCCCATCTATTGCC     | 178                   | AP003706        |
| P3     | CAACCTCGTCTTTGAGCCCA<br>CGCCGAAAATGAGCTCTAC      | 245                   | AP003374        |
| P4     | TTCATCCTGTCGCCAACG<br>ATGGATGCGTGATGCGTC         | 152                   | AP003335        |
| P5     | GGAAGGCATAGAACGCAAGA<br>CTGATGCCTATACCATGCTACTGT | 122                   | AP003335        |
| P6     | TTCTCCTTCTCCCGTTCCT<br>CGGCCCTGTACTTCTGATTC      | 152                   | AP003335        |
| P7     | CAACCAGTCTACAGCCACATCTC<br>AAGGGCGTATTTTCAGCGTC  | 205                   | AP003335        |
| P8     | CACCCAGAGCAAACACTGTCAG<br>GAACTGTACGTTTCCCCTG    | 261                   | AP004363        |
| P9     | GCCTTACAACCAACGACGACT<br>TATGTGTCTAGCTGCACTCCCA  | 181                   | AP003450        |
