# Supplementary material for: Disruption of the Rice Plastid Ribosomal Protein S20 Leads to Chloroplast Developmental Defects and Seedling Lethality
Source: PubMed Central journal article supplement (PMC3789801; doi:10.1534/g3.113.007856), 2013-10-01
Supplement: supp_g3.113.007856_TableS2.pdf [file supp_g3.113.007856_TableS2.pdf]

**Table S2 Primers for Real-time PCR**

| Gene name      | Forward primer (5'→3') | Reverse primer (5'→3') |
|----------------|------------------------|------------------------|
| <i>Cab1R</i>   | AGATGGGTTTAGTGCGACGAG  | TTTGGGATCGAGGGAGTATTT  |
| <i>CAO1</i>    | GATCCATACCCGATCGACAT   | CGAGAGACATCCGGTAGAGC   |
| <i>HEMA</i>    | CGCTATTTCTGATGCTATGGGT | TCTTGGGTGATGATTGTTTGG  |
| <i>PORA</i>    | TGTACTGGAGCTGGAACAACAA | GAGCACAGCAAATCCTAGACG  |
| <i>YGL1</i>    | CAGTCTCCAATGGCCACCT    | TGCTTTCATCAGTGGCTGGT   |
| <i>RPS7</i>    | GCCAAAATCCATTCCAATTC   | GGAGATGTACACGAGGAGATTG |
| <i>RpoB</i>    | TATGGTCTAATTCGAGCGGT   | TATGGTCTAATTCGAGCGGT   |
| <i>rbcl</i>    | CTTGGCAGCATTCCGAGTAA   | ACAACGGGCTCGATGTGATA   |
| <i>psaA</i>    | GCGAGCAAATAAAACACCTTTC | GTACCAGCTTAACGTGGGGAG  |
| <i>psbA</i>    | CCCTCATTAGCAGATTCGTTTT | ATGATTGTATTCCAGGCAGAGC |
| <i>OsPoLP</i>  | ACCGTGCTTTCAGGCTTGG    | GCTGACTGATAATCACACG    |
| <i>FtsZ</i>    | AAAGGACATAACCTTGCAAG   | AGTTTTCTATTGAACCGTG    |
| <i>rbcS</i>    | TCCGCTGAGTTTTGGCTATTT  | GGACTTGAGCCCTGGAAGG    |
| <i>V2</i>      | GAGGAGTTCCTCACGATGAT   | AGCATCAATGATAGACTCC    |
| <i>RNRL</i>    | GTTAGATGCTTCACTACACAG  | GTACCATTGCCAACATGGCAAC |
| <i>RNRS</i>    | GCCAAAATCCATTCCAATTC   | GGAGATGTACACGAGGAGATTG |
| <i>16SrRNA</i> | CCGTTGGTGTCTTTCCGAT    | TTCAAGTCCGCCGTCAAATC   |
| <i>ASL1</i>    | CACGCTCTTCCCTCTCCT'    | GTAGGAGGCGGACAGGCG     |
| <i>OsRpoTp</i> | TCCTCATGTGCGAGCAAGGAT  | GAAAGAATGTCTGGACTTTG   |
| <i>Actin</i>   | AGGAAGGCTGGAAGAGGACC   | CGGGAAATTGTGAGGGACAT   |
